# Supplementary material for: Luminescence properties and exciton dynamics of core–multi-shell semiconductor quantum dots leading to QLEDs
Source: Royal Society of Chemistry journal article supplement (doi:10.1039/c9dt00989b), 2019-01-01
Supplement: c9dt00989b1.pdf [file c9dt00989b1.pdf]

**Supporting information**

**Luminescent Properties and Exciton Dynamics of Core-Multi-Shell Semiconductor Quantum Dots Leading to QLEDs**

Mohan Singh Mehata\* and R. K. Ratnesh

Laser-Spectroscopy Laboratory, Department of Applied Physics, Delhi Technological University, Bawana Road, Delhi-110042, INDIA.

*\*Corresponding author E-mail: [msmehata@gmail.com](mailto:msmehata@gmail.com); [msmehata@dtu.ac.in](mailto:msmehata@dtu.ac.in)*

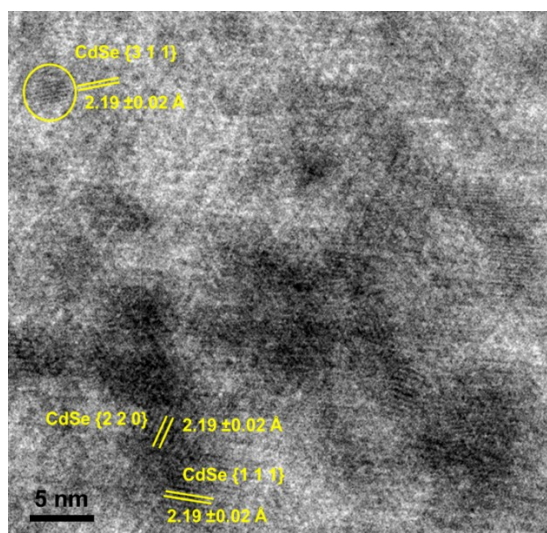

Fig. S1: HRTEM image (with higher magnification, showing lattice fringes) of CdSe QDs.

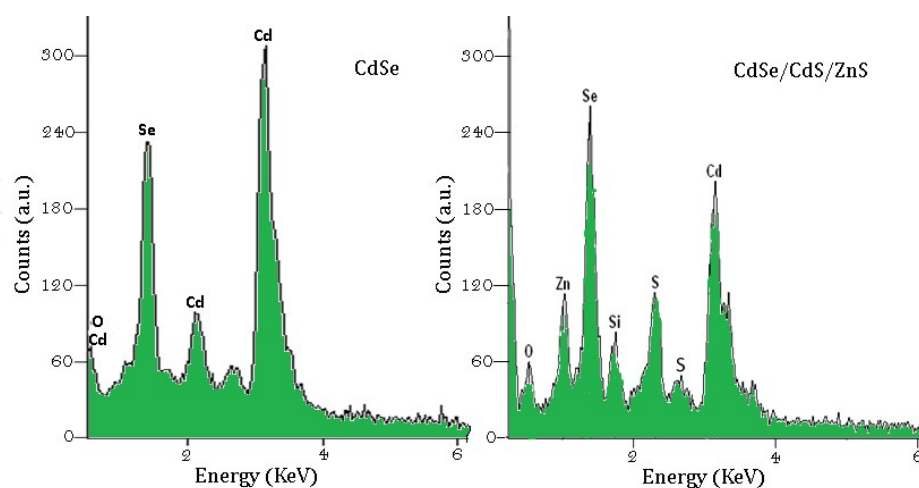

Figure S2: EDX spectra of CdSe and CdSe/CdS/ZnS core-shell QDs.

Table S1: The percentage of constituents of each element in the CdSe and CdSe/CdS/ZnS core-shell QDs.

| Samples      | Elements | Weight % | Atom % |
|--------------|----------|----------|--------|
| CdSe         | Cd       | 68.72    | 60.25  |
|              | Se       | 31.28    | 39.75  |
| CdSe/CdS/ZnS | Cd       | 56.63    | 43.77  |
|              | Se       | 25.46    | 24.82  |
|              | Zn       | 08.59    | 12.52  |
|              | S        | 09.32    | 18.89  |

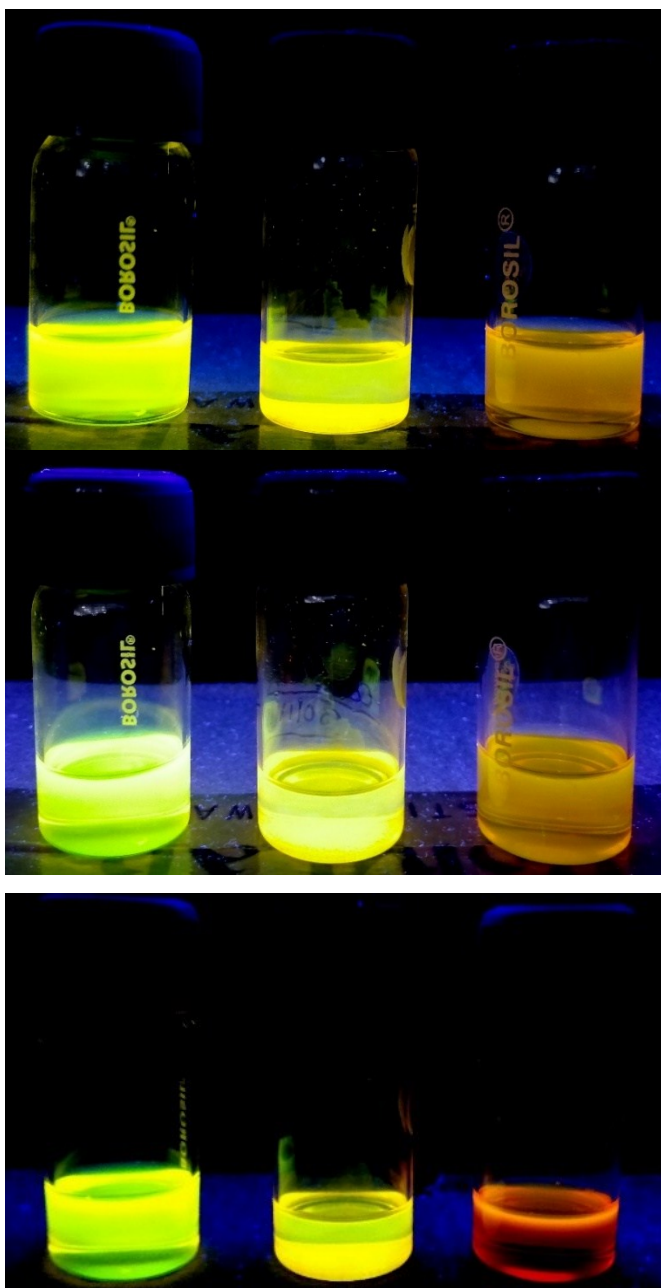

Figure S3: Image of CdSe (left), CdSe/CdS/ZnS (middle) and CdSe/ZnS/ZnS (right) QDs colloid (top-to-bottom corresponds three different concentration) under irradiated with 365 nm UV lamp.

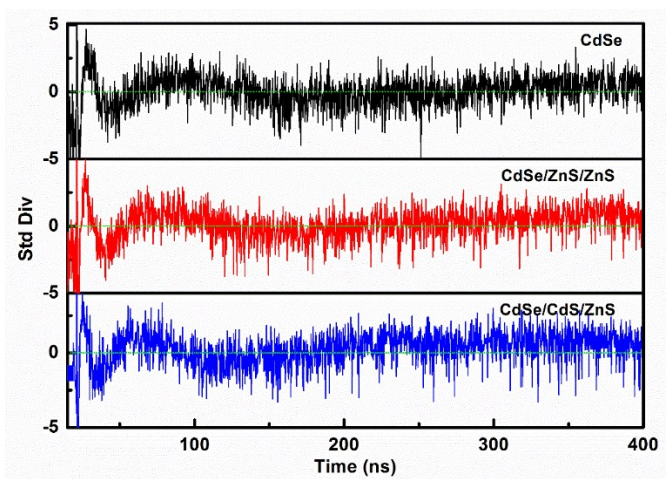

Figure S4: Residuals of fitted decay curves of CdSe, CdSe/ZnS/ZnS and CdSe/CdS/ZnS core-shell QDs dispersed in toluene.

**The rate of electron transfer ( $K_{eT}$ ) for CdSe-core and different core-multi-shell QDs**

$$K_{eT} = \frac{1}{\tau_{QDC}} - \frac{1}{\tau_{QD}}$$

Where  $\tau_{QDC}$  = The average lifetime of complex QDs

$\tau_{QD}$  = The average lifetime of QDs

Table S2:

| Sample       | $K_{eT} \times 10^9 (S^{-1})$ |
|--------------|-------------------------------|
| CdSe         | 0.026                         |
| CdSe/CdS     | 0.014                         |
| CdSe/ZnS     | 0.003                         |
| CdSe/CdS/ZnS | 0.017                         |
| CdSe/CdS/ZnS | 0.006                         |
| CdSe/ZnS/ZnS | - 0.005                       |
| CdSe/CdS/ZnS | 0.006                         |
